# Supplementary material
Source: PubMed Central journal article supplement (PMC10565508)

**Supplemental Figure 1** – Dose-response curves of each Hsp90i in FF cells are shown with corresponding 24 hrs IC<sub>50</sub> values tabulated in micromolar concentrations.

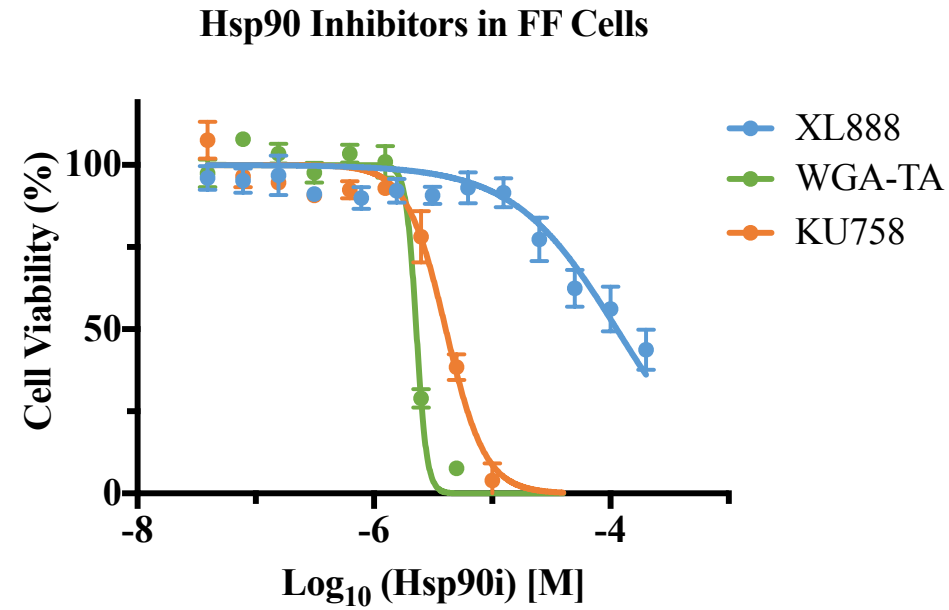

|        | IC <sub>50</sub> (μM) |
|--------|-----------------------|
| XL888  | 113.3                 |
| KU758  | 4.05                  |
| WGA-TA | 2.28                  |

**Supplemental Figure 2** – The combination effect of Hsp90 inhibitor combinations in UACC-62. Ve+Cb combination (FDA approved) is shown for comparison.

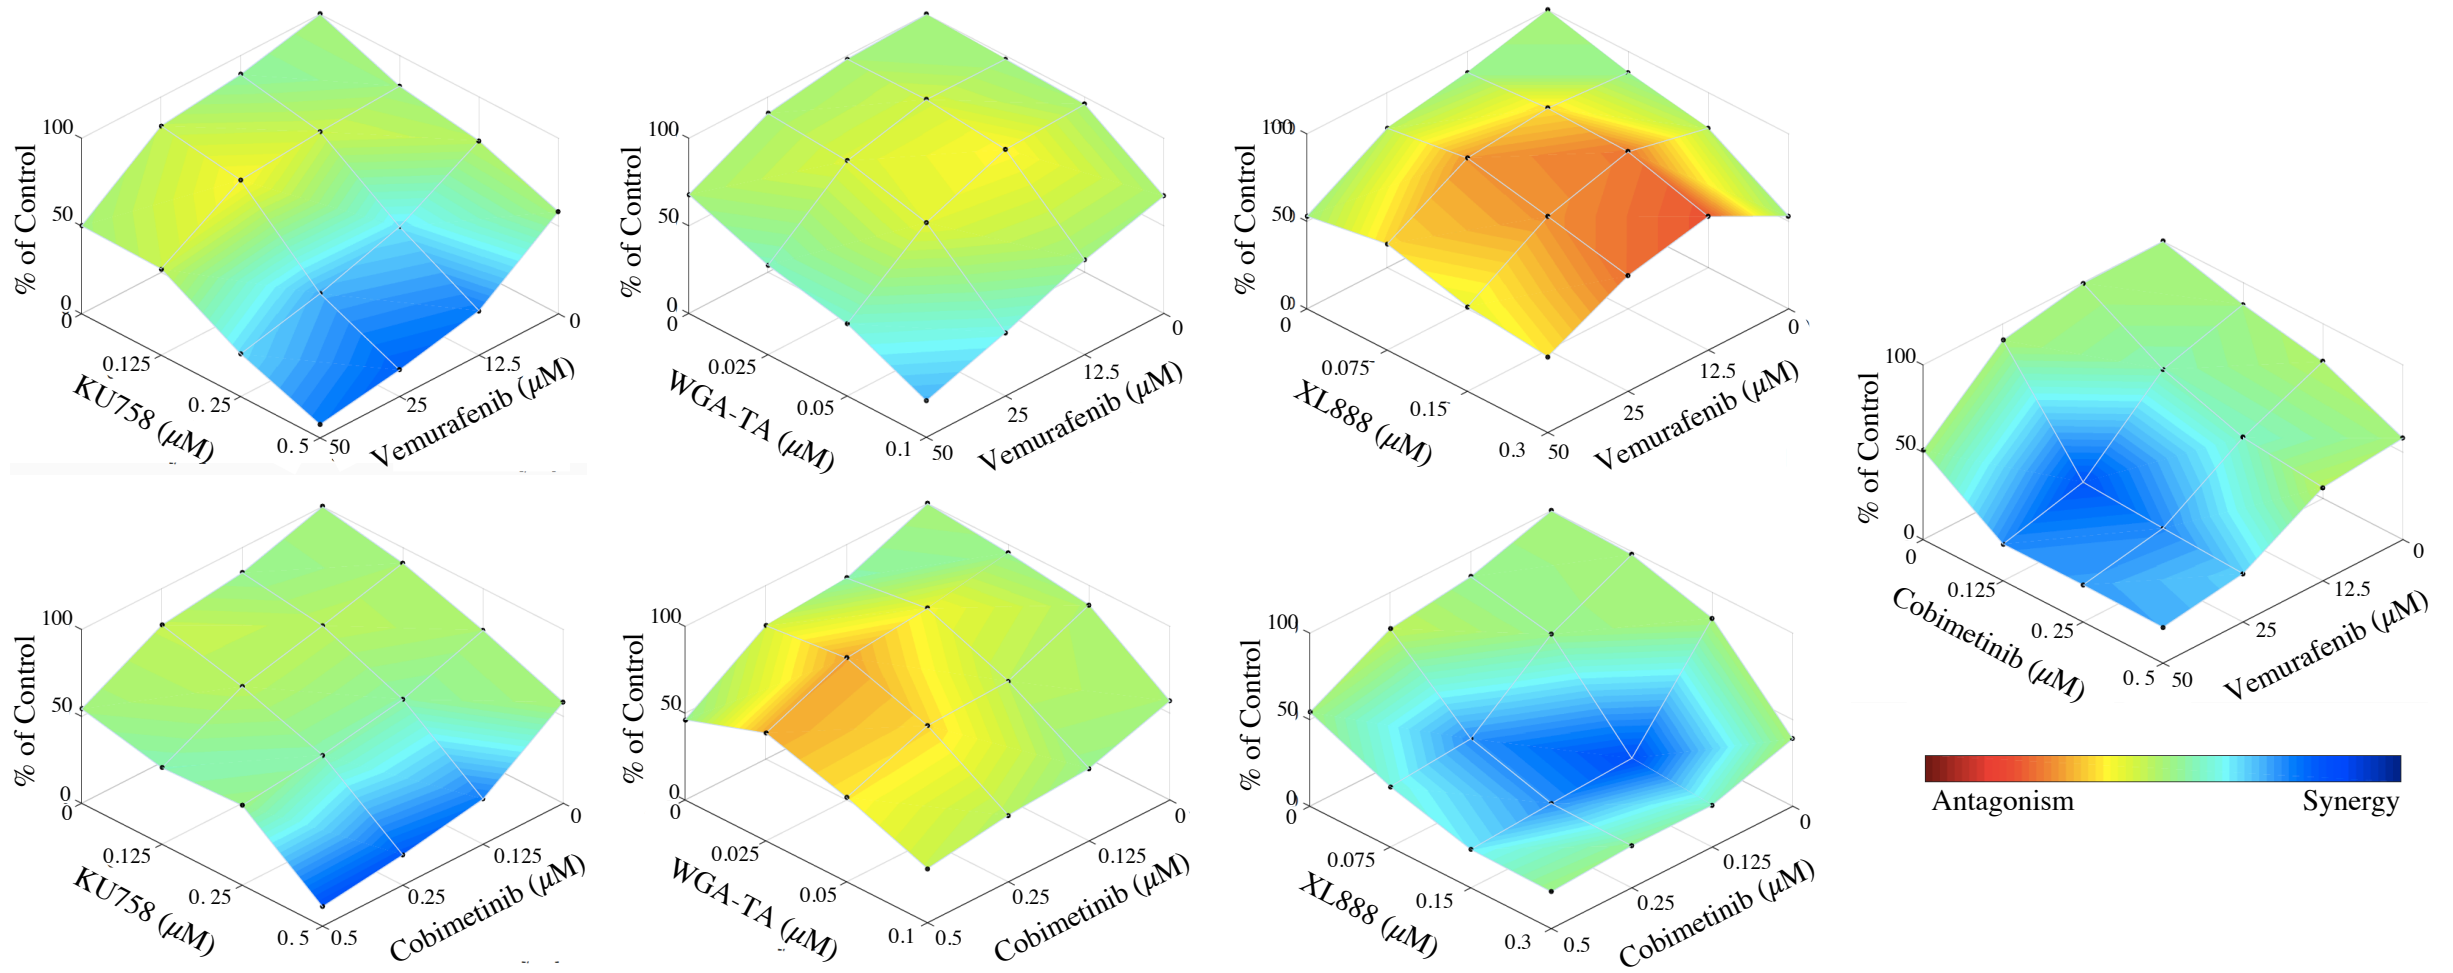

**Supplemental Figure 3** - Dose-response curves of Hsp90i KU758 in melanoma cells are shown with corresponding 24 hrs IC<sub>50</sub> values tabulated in micromolar concentrations.

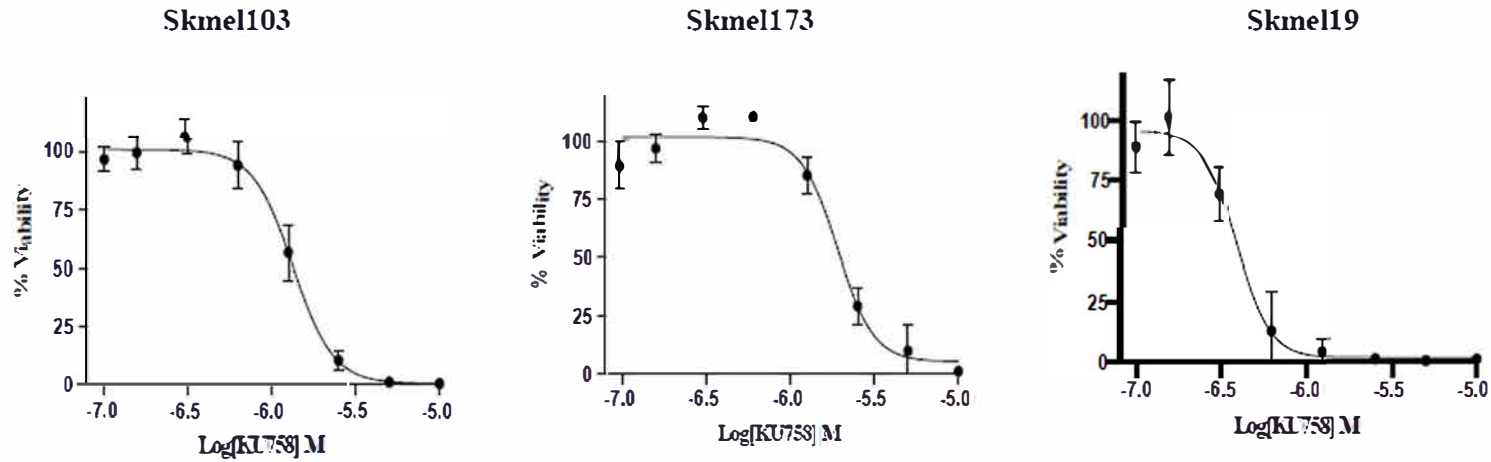

**Supplemental Table 1** – The CI values are listed for each inhibitor combination treatment in UACC-62 between (A) Hsp90i and MAPKi, as well as (B) Ve+Cb. Synergistic combination boxes are colored according to relative CI value: CI value < 0.5 (blue), 0.5 < CI value < 1.0 (green).

A)

|    |       | KU758      |       |       | WGA-TA  |       |       | XL888 |       |       |     |
|----|-------|------------|-------|-------|---------|-------|-------|-------|-------|-------|-----|
|    |       | ( $\mu$ M) | 0.125 | 0.25  | 0.5     | 0.025 | 0.5   | 0.1   | 0.075 | 0.15  | 0.3 |
| Ve | 12.5  | 1.445      | 0.428 | 0.291 | 116.814 | 0.353 | 0.070 | 8.166 | 7.199 | 2.580 |     |
|    | 25    | 1.452      | 0.340 | 0.262 | 1.636   | 0.181 | 0.045 | 5.645 | 2.136 | 1.732 |     |
|    | 50    | 0.815      | 0.248 | 0.185 | 0.231   | 0.074 | 0.037 | 0.725 | 0.536 | 0.757 |     |
| Cb | 0.125 | 1.166      | 0.735 | 0.315 | 1.198   | 1.557 | 1.701 | 0.895 | 0.236 | 0.342 |     |
|    | 0.25  | 1.014      | 0.717 | 0.235 | 0.994   | 1.341 | 1.514 | 0.362 | 0.282 | 0.410 |     |
|    | 0.5   | 0.723      | 0.883 | 0.202 | 0.887   | 1.063 | 1.326 | 0.522 | 0.364 | 0.471 |     |

B)

|    |      | Cb         |       |       |     |
|----|------|------------|-------|-------|-----|
|    |      | ( $\mu$ M) | 0.125 | 0.25  | 0.5 |
| Ve | 12.5 | 0.447      | 0.460 | 0.757 |     |
|    | 25   | 0.086      | 0.152 | 0.272 |     |
|    | 50   | 0.048      | 0.098 | 0.188 |     |

**Supplemental Figure 4** – Scratch and Boyden chamber assays in UACC-62. A) KU758 inhibitor combinations decreased cell migration (red lines indicate scratched cell-free area). B) quantification of the percent of cell migration at 24 hours after Hsp90i and MAPKi combinations. p values are recorded as significance between t = 0 and 24 hrs. C) The number of migrated cells after inhibitor single-agent and combination treatments.

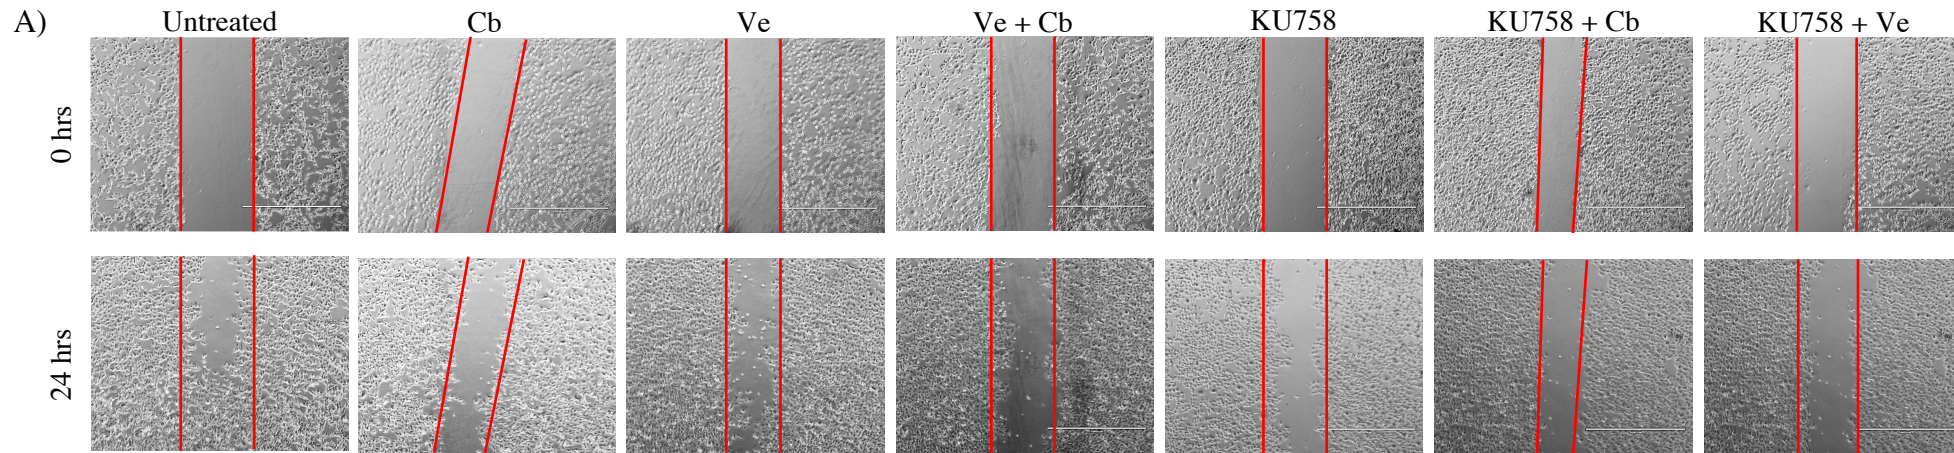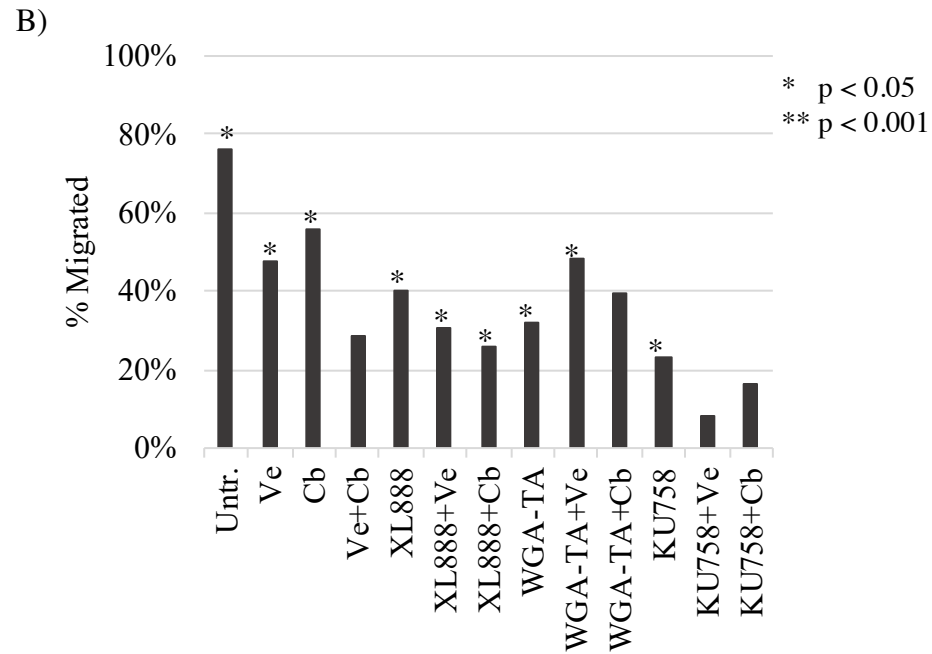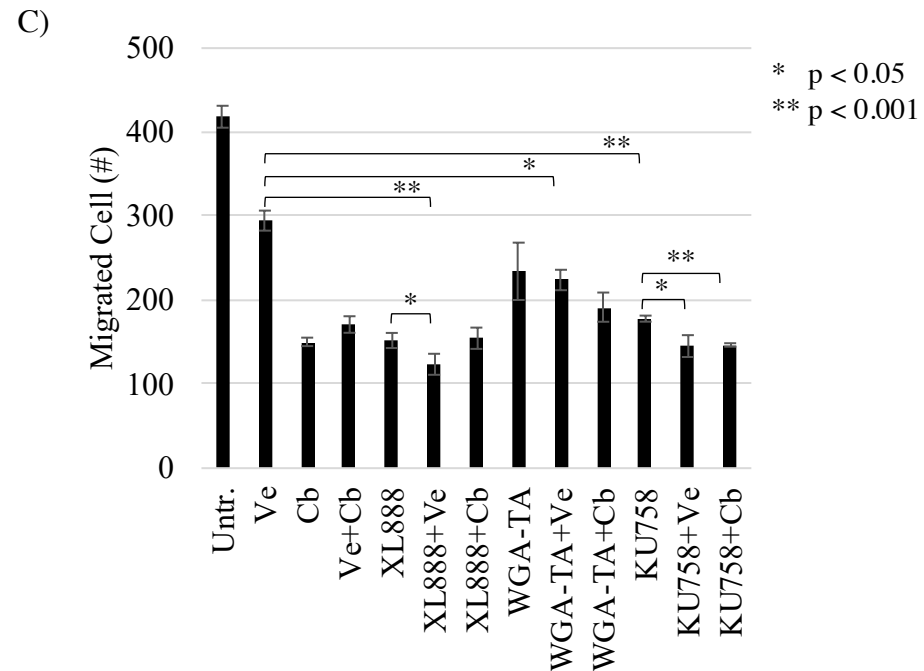

Supplement: NIHMS1683924-supplement-Supplemental_Digital_Content.pdf [file NIHMS1683924-supplement-Supplemental_Digital_Content.pdf]
